# Supplementary material
Source: publisher figshare collection journal article supplement (https://gsajournals.figshare.com/articles/dataset/_/13055816)
Supplement: Supplementary file 1 [file 1]

Figure S1

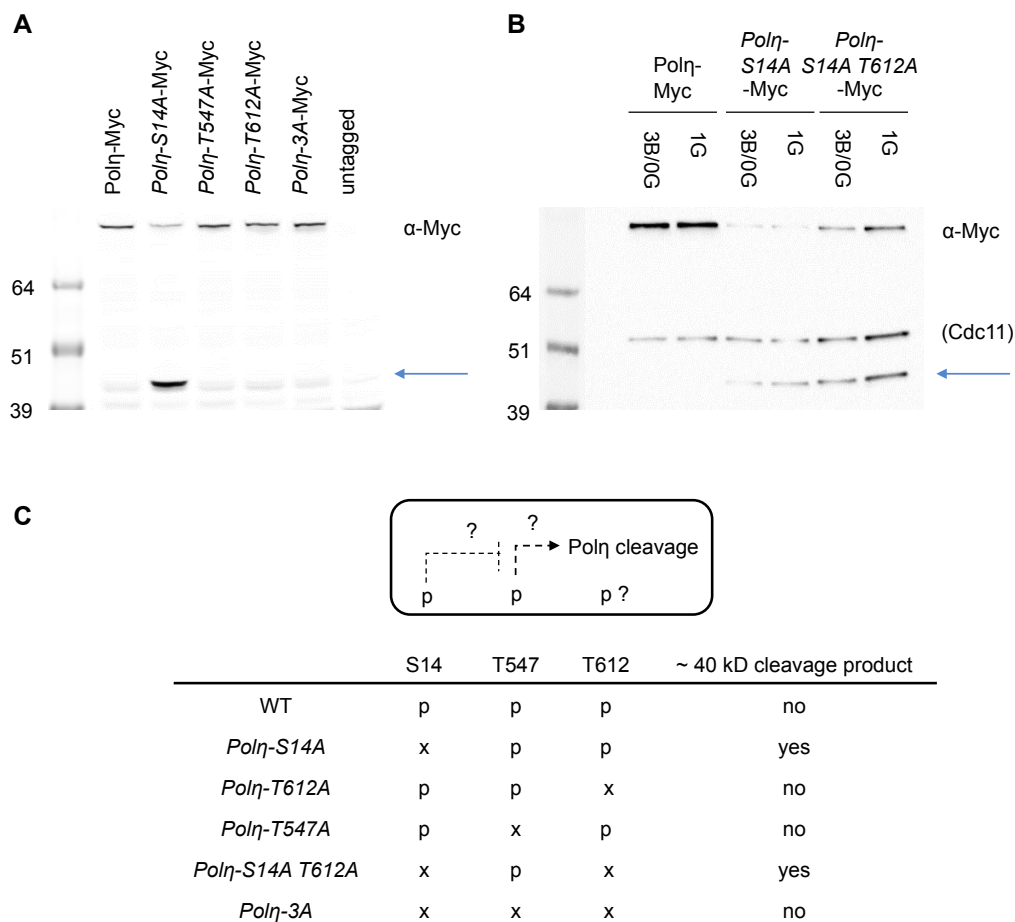

**Figure S1.** A population of Pol $\eta$  is being cleaved in *Polη-S14A* and *Polη-S14A T612A* mutants. (A) Protein levels of Myc-tagged Pol $\eta$ -phosphorylation site mutants, during G<sub>2</sub>/M arrest. The Western blot here is the same as the one in Figure 2A, showing the  $\alpha$ -Myc bands from 39 kDa and above. (B) Protein levels of Myc-tagged *Polη-S14A* single and - *S14A T612A* double mutants. Cdc11 was used as loading control. Blue arrows in (A) and (B) indicate the cleavage product. (C) Protein stability of the Pol $\eta$ -phosphorylation mutants in summary, together with the proposed actions of Pol $\eta$ -S14 and T547 phosphorylation shown in the box. 3B/0G, three hours benomyl/zero hour time-point of *GAL*-induction; 1G, one hour *GAL*-induction; p, phosphorylated; x, mutated residue(s).

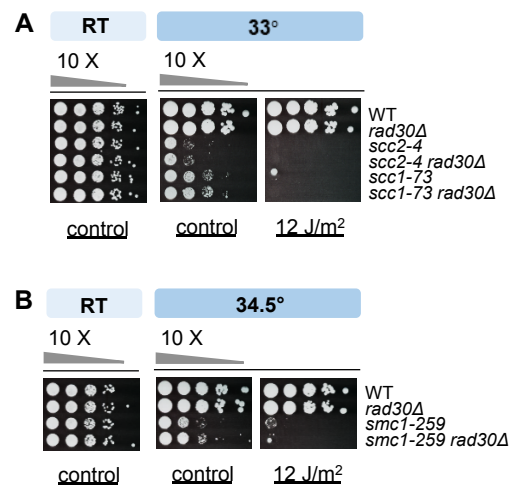

**Figure S2.** UV sensitivities of cohesin mutants at restrictive temperature. (A-B) Each strain was grown to mid-log phase and the following 10-fold serial dilutions were spotted on YEPD, with or without follow-on UVC exposures. Scc2 and Scc1 are inactivated at 33°; Smc1 is inactivated at 34.5°. All plates were documented on the third day. RT, room temperature. One representative experiment from two independent spot assays performed is shown.

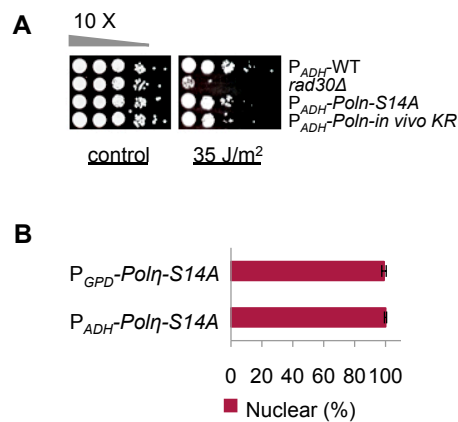

**Figure S3.** UV sensitivities and nuclear accumulation of selected Polη point mutants controlled by the constitutive strong *ADH* promoter. (A) UV spot assay of P<sub>ADH</sub>-Polη-S14A and P<sub>ADH</sub>-Polη-in vivo KR. Each strain was grown to mid-log phase. Ten-fold serial dilutions were then spotted on YEPD plates and exposed to 35 J/m<sup>2</sup> UVC. Plates were documented after three days at room temperature. (B) Quantitation of Polη-S14A nuclear accumulation. In situ staining was performed, the percent of cells displaying nuclear accumulation was determined as the cells positive for anti-Myc, with overlapping anti-Myc and DAPI signals. Polη-S14A-Myc controlled by the alternative constitutive strong promoter *GPD* was used for comparison. Means ± STDEV from at least two independent experiments are shown. YEPD, YEP media supplemented with glucose.

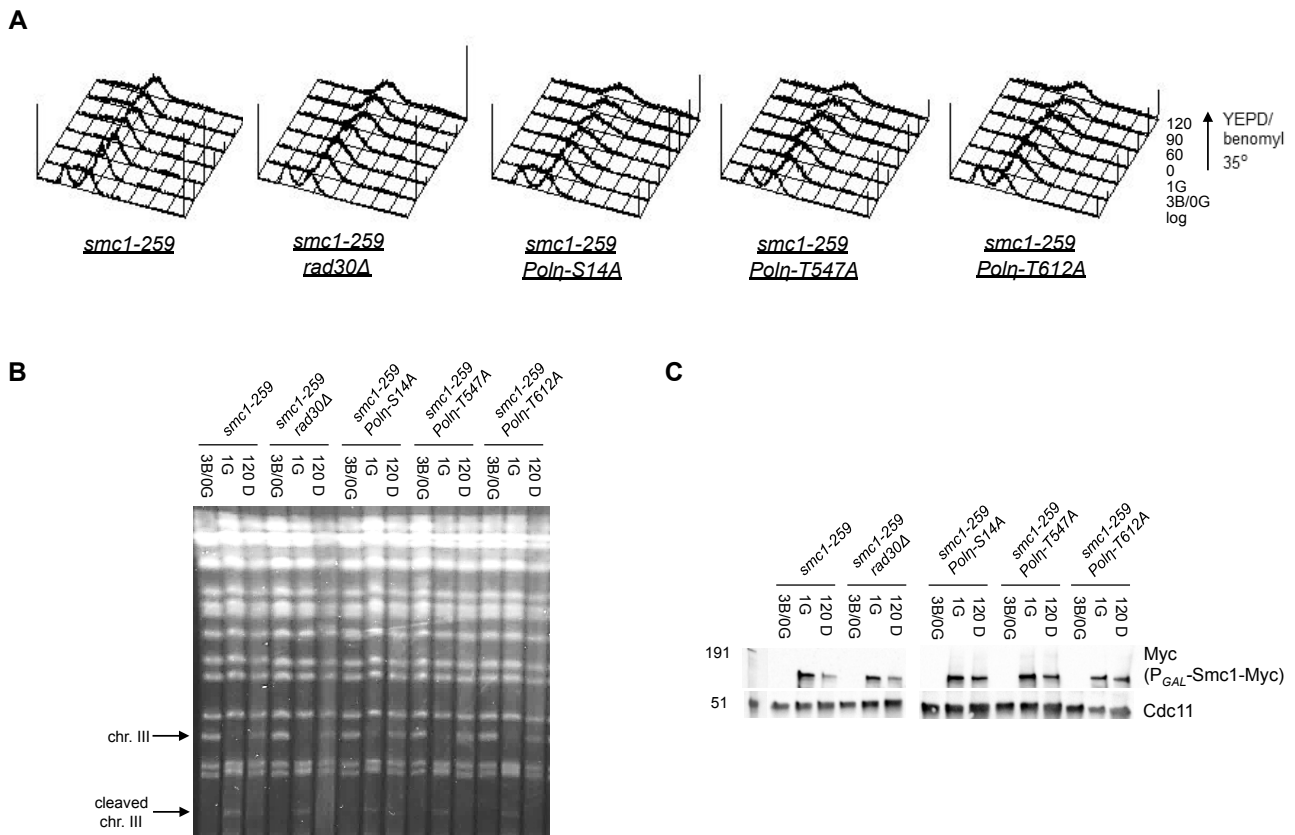

**Figure S4.** Examples of included controls for a typical damage-induced cohesion experiment. Shown here are the controls for the damage-induced cohesion experiment of the single Pol $\eta$ -phosphorylation mutants in Figure 6C. (A) FACS analysis to confirm benomyl induced G<sub>2</sub>/M arrest. (B) Pulsed-field gel electrophoresis to monitor efficiency of break induction on Chr. III ( $P_{GAL}$ -HO). (C) Western blot to monitor expression of ectopic  $P_{GAL}$ -SMC1-MYC (Smc1 WT). Cdc11 was used as loading control. 3B/0G, three hours benomyl/zero hour time-point of  $GAL$ -induction; 1G, one hour  $GAL$ -induction; 120 D, 120 minutes in YEP media supplemented with glucose at 35°C; Chr., chromosome; HO, Homothallic switching endonuclease.

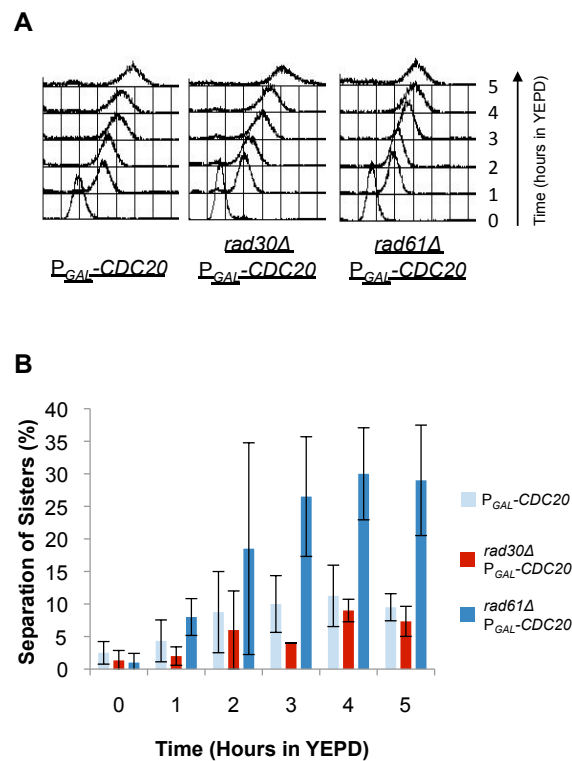

**Figure S5.** Sister chromatid cohesion maintenance is independent of Pol $\eta$ . (A) FACS analysis to monitor cell cycle distribution. Cells were initially synchronized in G<sub>1</sub> by  $\alpha$ -factor in YEPG, and subsequently released into YEPD for arrest in G<sub>2</sub>/M by inactivating *CDC20* expression. (B) Sister chromatids separation was monitored at the *URA3* locus on Chr. V by the Tet-O/TetR-GFP system (see materials and methods for details). Means  $\pm$  STDEV from at least two independent experiments are shown. YEPG, YEP media supplemented with galactose; YEPD, YEP media supplemented with glucose; Chr., chromosome.
